# Supplementary material for: Systematischer Review zur Qualität der Kindertagespflege
Source: Atypon-hosted journal article supplement (doi:10.1026/2191-9186/a000554), 2022-01-01
Supplement: 2191-9186_a000554_esm1.pdf [file 2191-9186_a000554_esm1.pdf]

## Elektronisches Supplement

**Tabelle E1: Übersicht der Einzelbefunde zur Einflussgrößen der Qualität in der Kindertagespflege**

| Studien                               | Prädiktoren                                          | Korrelations-<br>koeffizient | N   | (stand.)<br>Betakoeffizient | Mittelwert-<br>unterschiede |
|---------------------------------------|------------------------------------------------------|------------------------------|-----|-----------------------------|-----------------------------|
| <b>(a) Finanzierung</b>               |                                                      |                              |     |                             |                             |
| Bromer et al., 2009                   | Einkommen                                            | 0,16                         | 120 |                             |                             |
| Doherty et al., 2000; 2006            | Einkommen                                            | 0,30*                        | 231 |                             |                             |
| Ghazvini, 1997                        | Einkommen                                            | 0,57*                        | 18  |                             |                             |
| Iutovich et al., 1997                 | Einkommen                                            | 0,19                         | 67  |                             |                             |
| Peisner-Feinberg et al., 2000         | Einkommen                                            | 0,33*                        | 151 |                             |                             |
| Porter & Reiman, 2015                 | Einkommen                                            | 0,32                         | 48  |                             |                             |
| Weaver 2001, 2002                     | Einkommen                                            | 0,23                         | 65  |                             |                             |
| Doherty et al., 2000; 2006            | Tagessatz                                            | 0,33*                        | 231 |                             |                             |
| Peisner-Feinberg et al., 2000         | Tagessatz                                            | 0,26*                        | 151 |                             |                             |
| Doherty et al. 2000/2006              | Bezahlter Urlaub/Überstunden                         | 0,14*                        | 231 |                             |                             |
| Ghazvini, 1997                        | Wöchentliche Entlohnung                              | 0,83*                        | 17  |                             |                             |
| <b>(b) Kooperation und Vernetzung</b> |                                                      |                              |     |                             |                             |
| Bromer et al., 2009                   | Mitgliedschaft in Dachverband                        | 0,35*                        | 120 |                             |                             |
| DeBord & Swayers, 1996                | Mitgliedschaft in Dachverband                        |                              | 22  |                             | 5,1 vs. 3,3                 |
| Holloway et al., 2001                 | Mitgliedschaft in Dachverband                        | 0,09                         | 86  |                             |                             |
| Doherty et al., 2000; 2006            | Mitgliedschaft in Dachverband (lokal)                | 0,24*                        | 231 |                             |                             |
| Doherty et al., 2000; 2006            | Mitgliedschaft in Dachverband (regional)             | 0,21*                        | 231 |                             |                             |
| Forry et al., 2013                    | Mitgliedschaft in Dachverband                        |                              | 182 | 0,23*                       |                             |
| Peisner-Feinberg et al., 2000         | Mitgliedschaft in Dachverband/Programm (Smart Start) | 0,39*                        | 151 |                             |                             |

## ESM: Systematischer Review zur Qualität der Kindertagespflege. Welche Rolle spielt Professionalisierung?

|                                         |                                                                                             |       |     |               |
|-----------------------------------------|---------------------------------------------------------------------------------------------|-------|-----|---------------|
| Bromer et al., 2009                     | Netzwerktreffen                                                                             | 0,17  | 80  |               |
| Bromer et al., 2009                     | Professionalisierungsmöglichkeiten im Dachverband (Supervision, Netzwerktreffen & Feedback) | 0,46* | 80  |               |
| Bromer et al., 2009                     | Qualitätsbegleitung 10 x in 6 Monaten (Netzwerk)                                            | 0,26* | 80  |               |
| Bromer et al., 2009                     | Weiterbildung vom Netzwerk                                                                  | 0,24* | 80  |               |
| Bromer et al., 2009                     | Zugang zu Telefon Supervision (Netzwerk)                                                    | 0,10  | 80  |               |
| Bromer et al., 2009                     | Dachverband-Support (Hilfe mit Behörden und Eigentümern)                                    | 0,22* | 80  |               |
| Bromer et al., 2009                     | Formales Feedback (Netzwerk)                                                                | 0,42* | 80  |               |
| <b>(c) Professionelle Haltung</b>       |                                                                                             |       |     |               |
| Weaver 2001, 2002                       | Professionelles Commitment                                                                  | 0,21  | 65  |               |
| Doherty et al., 2000; 2006              | Professionelles Commitment I                                                                | 0,16* | 231 |               |
| Doherty et al., 2000; 2006              | Professionelles Commitment II                                                               | 0,15* | 231 |               |
| Doherty et al., 2000; 2006              | Professionelles Commitment III                                                              | 0,23* | 231 |               |
| Doherty et al., 2000; 2006              | Professionelles Commitment IV                                                               | 0,17* | 231 |               |
| Doherty et al., 2000; 2006              | Professionelles Commitment V                                                                | 0,13* | 231 |               |
| Doherty et al., 2000; 2006              | Professionelles Commitment VI                                                               | 0,15* | 231 |               |
| Porter & Reiman., 2015                  | Vorstellung weitere Jahre als TP zu arbeiten                                                | 0,35* | 48  |               |
| Forry et al., 2013                      | Intrinsische Motivation am Berufsfeld                                                       |       | 182 | 0,25*         |
| <b>(d) Lizenzierung und Regulierung</b> |                                                                                             |       |     |               |
| Raikes et al., 2013                     | Lizensierung                                                                                |       | 514 | 4,46 vs. 3,67 |
| Bordin et al., 2000                     | Lizenzierte TP                                                                              | 0,49* | 31  |               |
| Rigby et al., 2007                      | Regulierung (Anzahl Kinder, Training)                                                       |       | 90  | 0,25*         |
| Raikes et al., 2005                     | Regulierungen/Standards                                                                     | 0,41* | 123 |               |
| Kelton et al., 2013                     | Professionalisierungsgrad (Business Administration)                                         | 0,35* | 31  |               |
| Tout et al., 2011                       | Elternrückmeldung                                                                           | -0,08 | 97  |               |

ESM: Systematischer Review zur Qualität der Kindertagespflege. Welche Rolle spielt Professionalisierung?

|                   |                                                    |      |    |       |
|-------------------|----------------------------------------------------|------|----|-------|
| Tout et al., 2011 | Kommunikation mit Eltern                           | 0,04 | 97 |       |
| Ghazvini, 1997    | Zusammenarbeit mit Eltern/Elternkommunikation      |      | 18 | 0,33* |
| Tout et al., 2011 | Beobachtung und Dokumentation (Kindergartenkinder) | 0,13 | 97 |       |
| Tout et al., 2011 | Beobachtung und Dokumentation (Kleinkinder)        | 0,10 | 97 |       |

---

Anmerkung: \*  $p < 0.05$
